# Supplementary material for: A cooperative mechanism drives budding yeast kinetochore assembly downstream of CENP-A
Source: PubMed Central journal article supplement — J Cell Biol. 2014 Aug 18;206(4):509–24. doi: 10.1083/jcb.201403081 (PMC4137059; doi:10.1083/jcb.201403081), 2014-08-18
Supplement: supp_jcb.201403081_JCB_201403081_sm.pdf [file supp_jcb.201403081_JCB_201403081_sm.pdf]

Hornung et al., <http://www.jcb.org/cgi/content/full/jcb.201403081/DC1>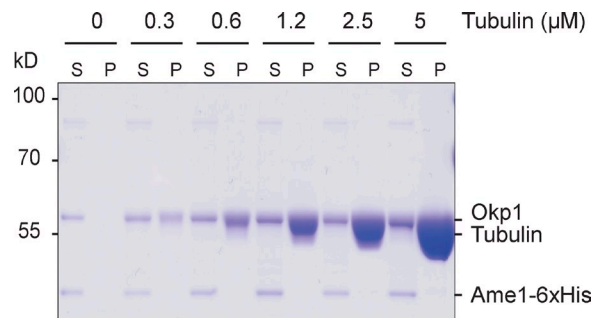

Figure S1. **Microtubule cosedimentation assay with recombinant AO complex.** S and P denote supernatant and pellet, respectively, after centrifugation with taxol-stabilized microtubules. Note that the AO complex is found exclusively in the supernatant fraction.

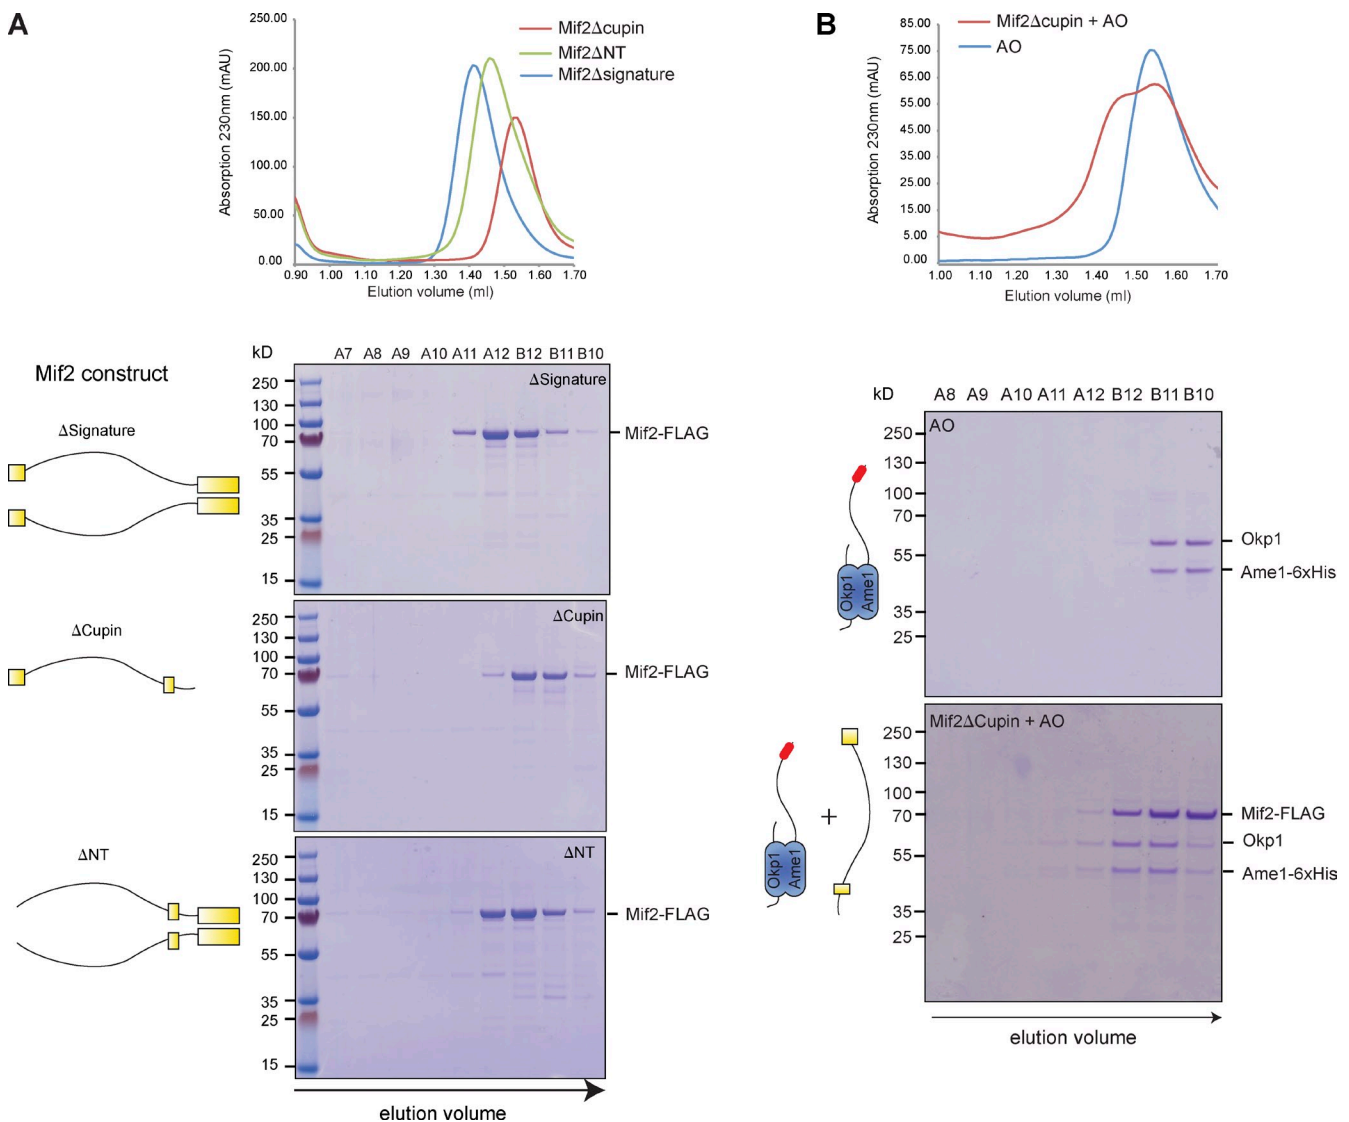

Figure S2. **Molecular requirements for Mif2 dimerization and AO binding.** (A) SEC experiment of different Mif2 constructs on a Superose 6 column. The depicted experiment is representative of  $n > 3$  binding assays under identical conditions. (B) SEC of the AO complex alone (top) or in combination with the Mif2 $\Delta$ Cupin mutant ( $5 \mu\text{M}$  for each complex). Superose 6 PC 3.2/30 column was used for the experiment. The depicted experiment is representative of  $n > 3$  binding assays under identical conditions. The same Ame1–Okp1 data are also presented in Fig. 7 B.

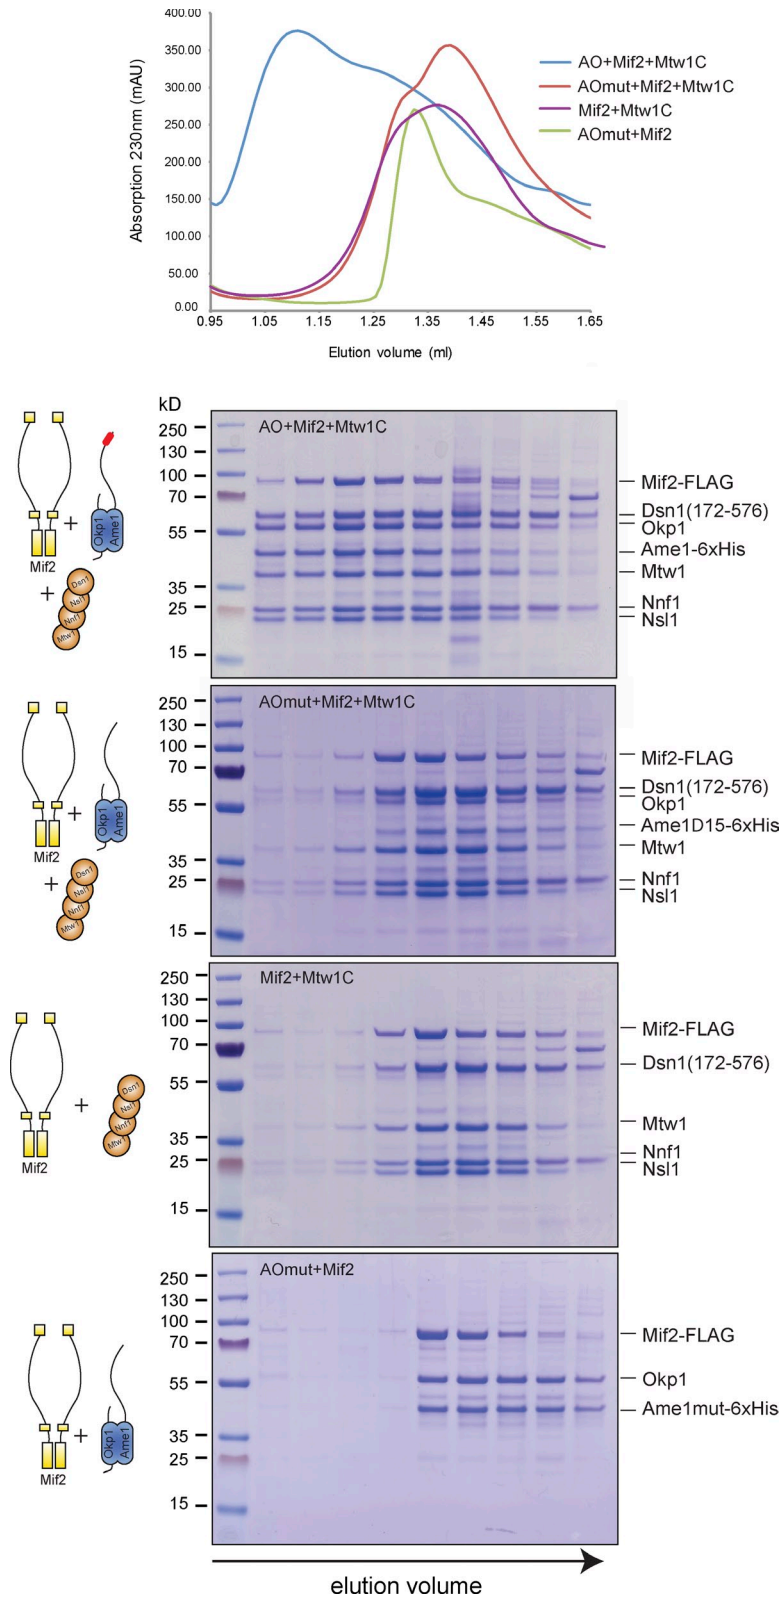

Figure S3. **Deletion of the Ame1 motif prevents the cooperative assembly of a large Mif2-AO-Mtw1C complex.** SEC experiment on a Superose 6 PC 3.2/30 column of full-length AO, Mtw1 complex, and Mif2 (top); the same combination with AO containing the Ame1<sup>15-325</sup> mutation (second row); the Mtw1 complex and Mif2 (third row); and AO with the Ame1<sup>15-325</sup> mutation and Mif2 (bottom). Note that formation of an early eluting Mif2-AO-Mtw1 complex depends on the Mtw1 binding motif in AO. Absorption profile corresponding to the gels is given at the top of the figure. The depicted experiment is representative of  $n > 3$  binding assays under identical conditions. The same Mif2 + AO + Mtw1C data are also presented in Fig. 7 D.

Table S1. **Plasmids used in this study**

| Number | Plasmid                                     |
|--------|---------------------------------------------|
| PPH7   | pST39-Mtw1/Nsl1/Nnf1-6xHis/Dsn1             |
| PPH13  | pST39-Mtw1/Nsl1/Nnf1-6xHis                  |
| PPH62  | pET28-Dsn1 <sup>172-576</sup>               |
| PPH173 | pST39-Mtw1/Nnf1-6xHis                       |
| PPH20  | pST39-Mtw1/Nsl1-6xHis/Dsn1                  |
| PPH35  | pETDuet1-Spc24-6xHis/Spc25                  |
| PPH18  | pACYCDuet1-Ndc80-6xHis/Nuf2                 |
| PPH60  | pST39-Ctf19/Mcm21/Okp1/Ame6xHis             |
| PPH64  | pST39-Ctf19/Mcm21/Okp1/Ame6xFLAG            |
| PPH71  | pST39-Ctf19-6xHis/Mcm21                     |
| PPH74  | pST39-Okp1-Ame1-6xHis                       |
| PPH117 | pCOLA-lml3/Chl4-FLAG                        |
| PPH123 | pET28-6xHis-Mif2                            |
| PPH108 | pST39-Mtw1/Nsl1/Nnf1/6xHis-Dsn1             |
| PPH96  | pST39-Mtw1/Nnf1-6xHis/Ame1-FLAG             |
| PH174  | pST39-Okp1/Ame1 <sup>15-324</sup> -6xHis    |
| PPH112 | pRS316-Ame1 <sup>WT</sup>                   |
| PPH111 | pRS316-Ame1 <sup>15-324</sup>               |
| PPH145 | pRS306-Ame1 <sup>WT</sup> -6x-FLAG          |
| PPH146 | pRS306-Ame1 <sup>15-324</sup> -6x-FLAG      |
| PPH156 | pRS306-Ame1 <sup>WT</sup> -EGFP             |
| PPH157 | pRS306-Ame1 <sup>15-324</sup> -EGFP         |
| PPH160 | pRS306-Ame1 <sup>R3D</sup> -EGFP            |
| PPH170 | pRS306-Ame1 <sup>R10D</sup> -EGFP           |
| PPH168 | pRS306-Ame1 <sup>R12D</sup> -EGFP           |
| PPH169 | pRS306-Ame1 <sup>R10A</sup> -EGFP           |
| PPH167 | pRS306-Ame1 <sup>R12A</sup> -EGFP           |
| PPH172 | pGEX6P1-Ame1 <sup>1-30</sup>                |
| PPH171 | pGEX6P1-Ame1 <sup>1-114</sup>               |
| pSW181 | Mif2-Flag in pFL                            |
| pSW183 | Mif2-ΔSignature-FLAG in pFL                 |
| pSW184 | Mif2-ΔCupin-FLAG in pFL                     |
| pSW186 | Mif2-ΔNT-FLAG in pFL                        |
| pSW189 | Strep-Dsn1 in pFL with Mtw1, Nnf1, Nsl1     |
| pSW190 | Mif2-Flag + Mtw1 complex untagged in pFL    |
| pSW192 | Mif2 + -250 wild-type XhoI-NotI into pRS306 |
| pSW194 | Mif2-ΔSignature in pRS306                   |
| pSW193 | Mif2-ΔNT in pRS306                          |
| pSW195 | Mif2-ΔCupin in pRS306                       |

Table S2. Yeast strains used in this study

| Strain | Genotype                                                                                                                                   |
|--------|--------------------------------------------------------------------------------------------------------------------------------------------|
| SWY536 | MAT a, tor1-1, fpr1::loxP-Leu2-loxP, RPL13A-2xFKBP12::lox-TRP1-loxP, Ame1-FRB::KanMX                                                       |
| YPH 18 | MAT a, tor1-1, fpr1::loxP-Leu2-loxP, RPL13A-2xFKBP12::lox-TRP1-loxP, Ame1-FRB::KanMX, pRS316-Ame1::URA                                     |
| YPH 19 | MAT a, tor1-1, fpr1::loxP-Leu2-loxP, RPL13A-2xFKBP12::lox-TRP1-loxP, Ame1-FRB::KanMX, pRS316-Ame1 <sup>15-324</sup> ::URA                  |
| YPH 24 | MAT a, tor1-1, fpr1::loxP-Leu2-loxP, RPL13A-2xFKBP12::lox-TRP1-loxP, Ame1-FRB::KanMX, Ame1-6xFLAG::URA                                     |
| YPH 25 | MAT a, tor1-1, fpr1::loxP-Leu2-loxP, RPL13A-2xFKBP12::lox-TRP1-loxP, Ame1-FRB::KanMX, Ame1 <sup>15-324</sup> 6xFLAG::URA                   |
| YPH 26 | MATa/alpha, leu2-3,112/leu2-3,112, ura3-52/ura3-52, ade2-1/ADE2, lys2/LYS, CNN1/cnn1Δ::HIS3, Ame1::URA3                                    |
| YPH 27 | MATa/alpha, leu2-3,112/leu2-3,112, ura3-52/ura3-52, ade2-1/ADE2, lys2/LYS, CNN1/cnn1Δ::HIS3, Ame1(15-324)::URA3                            |
| YPH 29 | MAT a, tor1-1, fpr1::loxP-Leu2-loxP, RPL13A-2xFKBP12::lox-TRP1-loxP, Ame1-FRB::KanMX, Ame1-6xFLAG::URA, Pds1-HA::natNT2                    |
| YPH 30 | MAT a, tor1-1, fpr1::loxP-Leu2-loxP, RPL13A-2xFKBP12::lox-TRP1-loxP, Ame1-FRB::KanMX, Ame1 <sup>15-324</sup> 6xFLAG::URA, Pds1-HA::natNT2  |
| YPH 31 | MAT a, tor1-1, fpr1::loxP-Leu2-loxP, RPL13A-2xFKBP12::lox-TRP1-loxP, Ame1-FRB::KanMX, Ame1-EGFP::URA                                       |
| YPH 32 | MAT a, tor1-1, fpr1::loxP-Leu2-loxP, RPL13A-2xFKBP12::lox-TRP1-loxP, Ame1-FRB::KanMX, Ame1-EGFP <sup>15-324</sup> ::URA                    |
| YPH 33 | MAT a, tor1-1, fpr1::loxP-Leu2-loxP, RPL13A-2xFKBP12::lox-TRP1-loxP, Ame1-FRB::KanMX, Ame1-EGFP::URA, Mif2-mCherry::His                    |
| YPH 34 | MAT a, tor1-1, fpr1::loxP-Leu2-loxP, RPL13A-2xFKBP12::lox-TRP1-loxP, Ame1-FRB::KanMX, Ame1-EGFP <sup>15-324</sup> ::URA, Mif2-mCherry::His |
| YPH 35 | MAT a, tor1-1, fpr1::loxP-Leu2-loxP, RPL13A-2xFKBP12::lox-TRP1-loxP, Ame1-FRB::KanMX, Ame1-EGFP::URA, Mtw1-mCherry::His                    |
| YPH 37 | MAT a, tor1-1, fpr1::loxP-Leu2-loxP, RPL13A-2xFKBP12::lox-TRP1-loxP, Ame1-FRB::KanMX, Ame1-EGFP <sup>15-324</sup> ::URA, Mtw1-mCherry::His |
| YPH 41 | MAT a, tor1-1, fpr1::loxP-Leu2-loxP, RPL13A-2xFKBP12::lox-TRP1-loxP, Ame1-FRB::KanMX, Ame1-R3D, R10D, R12D-6xFLAG::URA                     |
| YPH 43 | MAT a, tor1-1, fpr1::loxP-Leu2-loxP, RPL13A-2xFKBP12::lox-TRP1-loxP, Ame1-FRB::KanMX, Ame1-EGFP-R3A::URA                                   |
| YPH 44 | MAT a, tor1-1, fpr1::loxP-Leu2-loxP, RPL13A-2xFKBP12::lox-TRP1-loxP, Ame1-FRB::KanMX, Ame1-EGFP-R10D::URA                                  |
| YPH 45 | MAT a, tor1-1, fpr1::loxP-Leu2-loxP, RPL13A-2xFKBP12::lox-TRP1-loxP, Ame1-FRB::KanMX, Ame1-EGFP-R12A::URA                                  |
| YPH 46 | MAT a, tor1-1, fpr1::loxP-Leu2-loxP, RPL13A-2xFKBP12::lox-TRP1-loxP, Ame1-FRB::KanMX, Ame1-EGFP-R12D::URA                                  |
| SWY903 | Mat a, lys2-801, leu2-3,112, trp1, mif2Δ::HIS3, ura3-52::Mif2-WT::URA3                                                                     |
| SWY905 | Mat a, lys2-801, leu2-3,112, mif2Δ::HIS3, ura3-52::Mif2-ΔN::URA3                                                                           |
| SWY907 | Mat a, ade2-1, leu2-3,112, mif2Δ::HIS3, ura3-52::Mif2-ΔCupin::URA3                                                                         |
| SWY909 | Mat alpha, leu2-3,112, lys2-801, mif2Δ::HIS3, ura3-52::Mif2-ΔN::URA3, Mtw1-GFP::KanMX                                                      |
| SWY383 | MAT a; leu2, ura3-52, trp1, prb1-1122, pep4-3, pre1-451, Ame1-6xHis-6xFlag::KanMX                                                          |
| SWY397 | MATa/alpha, leu2-3,112/leu2-3,112, ura3-52/ura3-52, ade2-1/ADE2, lys2/LYS, Ame1/ame1Δ::HIS3                                                |
| SWY911 | Mat alpha, ura3-52, leu2-3,112, lys2-801, Mtw1-GFP::KanMX, Spc42-RFP::HIS3                                                                 |
| SWY909 | Mat alpha, leu2-3,112, lys2-801, mif2Δ::HIS3, ura3-52::Mif2-ΔN::URA3, Mtw1-GFP::KanMX                                                      |
| SWY918 | Mat a, leu2-3,112, lys2-801, mif2Δ::HIS3, ura3-52::Mif2-ΔN::URA3, cnn1Δ::KanMX                                                             |
| SWY922 | Mat a, his3Δ200, Ame1-FRB::KanMX, tor1-1, tetR-GFP::LEU2, fpr1 Δ::LEU2, RPL13-FKBP12::TRP1, tetOx112::URA3                                 |
| SWY923 | Mat a, his3Δ200, Ame1-FRB::KanMX, tor1-1, tetR-GFP::LEU2, fpr1Δ::LEU2, RPL13-FKBP12::TRP1, tetOx112::URA3 + pCEN(Ame1-WT)::HIS             |
| SWY924 | Mat a, his3Δ200, Ame1-FRB::KanMX, tor1-1, tetR-GFP::LEU2, fpr1Δ::LEU2, RPL13-FKBP12::TRP1, tetOx112::URA3 + pCEN(Ame1-15-324)::HIS         |

**Table S3 provides a comprehensive list of all interprotein cross-links found by the MS analysis of the Mif2-AO-Mtw1 complex.**
